# Supplementary material for: Genetically versus environmentally influenced obesity and risk of mortality and non-communicable diseases: A cohort study from the UK Biobank
Source: Research Square preprint supplement (doi:10.21203/rs.3.rs-8296230/v1), 2026-01-07
Supplement: Supplementary file 1 [file 800b4654ab2771207bfb3625.docx]

**Genetically and Environmentally Influenced Obesity: Associations with Mortality and Non-communicable Diseases**

Elsa Ojalehto Lindfors, Shayan Mostafaei, Martin Nakash, Chandra A Reynolds, Yiqiang Zhan, Anna Dahl Aslan, Juulia Jylhävä, Sara Hägg & Ida K. Karlsson.

**Supplementary material:**

[**Figure S1.** Flow chart of the study population. 2](#_Toc215909892)

[**Table S1.** Association between WHR quartiles, PGSWHR, and mortality risk. 3](#_Toc215909893)

[**Table S2.** ICD codes used to identify NCDs. 4](#_Toc215909894)

[**Table S3.** Self-reported disease codes mapped to ICD codes for NCDs 5](#_Toc215909895)

[**Table S4.** Risk of mortality or NCD in relation to BMI and WHR and a polygenic score for BMI and WHR adjusted for extra covariates. 7](#_Toc215909896)

[**Table S5.** Risk of mortality or NCD in relation to BMI adjusted for a polygenic score for WHR and WHR adjusted for a polygenic score for BMI. 9](#_Toc215909897)

[**Table S6.** Risk of the six most common cancer subtypes in relation to BMI and WHR and a polygenic score for BMI and WHR. 11](#_Toc215909898)

[**Table S7.** Risk of subtyped of NCDs in relation to BMI and WHR and a polygenic score for BMI and WHR. 13](#_Toc215909899)

[**Table S8.** Sex stratified risk of mortality or NCD in relation to BMI and WHR and a polygenic score for BMI and WHR among females. 15](#_Toc215909900)

[**Table S9.** Sex stratified risk of mortality or NCD in relation to BMI and WHR and a polygenic score for BMI and WHR among males. 17](#_Toc215909901)

[**Table S10.** Age stratified risk of mortality or NCD in relation to BMI and WHR and a polygenic score for BMI and WHR in midlife (ages 49–59 at baseline). 19](#_Toc215909902)

[**Table S11.** Age stratified risk of mortality or NCD in relation to BMI and WHR and a polygenic score for BMI and WHR in late life (ages 60–69 at baseline). 21](#_Toc215909903)

[**Table S12.** Ancestry stratified risk of mortality or NCD in relation to BMI and WHR and a polygenic score for BMI and WHR among individuals of European ancestry. 23](#_Toc215909904)

[**Table S13.** Ancestry stratified risk of mortality or NCD in relation to BMI and WHR and a polygenic score for BMI and WHR among individuals of non-European ancestry. 25](#_Toc215909905)

# **Figure S1.** Flow chart of the study population.

Analysis sample, N = 484,858

BMI measure available, N = 484,648,

WHR measure available, N = 484,856

Including those with date of diagnose, N = 500,351

Including those with genotype data, N = 484,990

Including those with date of baseline = 500,091

UKB

N = 502,617

# **Table S1.** Association between WHR quartiles, PGSWHR, and mortality risk.

| **WHR** | **Mortality** |
| --- | --- |
| Separate model |  |
| WHR Q1 | **0.93 (0.90-0.96)** |
| WHR Q2 | Ref |
| WHR Q3 | **1.11 (1.08-1.15)** |
| WHR Q4 | **1.46 (1.42-1.50)** |
| PGSWHR | **1.14 (1.12-1.15)** |
| Mutually adjusted model |  |
| WHR Q1 | **0.94 (0.91-0.97)** |
| WHR Q2 | Ref |
| WHR Q3 | **1.10 (1.07-1.13)** |
| WHR Q4 | **1.41 (1.37-1.45)** |
| PGSWHR | **1.03 (1.02-1.04)** |
| Interaction model |  |
| WHR Q1 | **0.93 (0.90-0.97)** |
| WHR Q2 | Ref |
| WHR Q3 | **1.11 (1.08-1.15)** |
| WHR Q4 | **1.39 (1.34-1.44)** |
| PGSWHR | 0.99 (0.96-1.02) |
| WHR Q1* PGSWHR | 1.01 (0.97-1.06) |
| WHR Q3* PGSWHR | 1.03 (0.99-1.08) |
| WHR Q4* PGSWHR | **1.07 (1.03-1.11)** |

Risk of mortality by waist-to-hip ratio (WHR) quartiles and a polygenic score for WHR (PGSWHR), estimated using separate, mutually adjusted, and interaction models. Hazard ratios (HRs) and 95% confidence intervals (CIs) are shown. WHR was categorized into sex-specific quartiles, with Q2 as the reference category. PGSWHR refers to the polygenic score for higher WHR, standardized to one standard deviation (SD). Separate models included WHR quartiles and PGSWHR in independent models, while mutually adjusted models included both WHR quartiles and PGSWHR in the same model. Interaction models additionally included interaction terms between WHR quartiles and PGSWHR. All models were adjusted for age, sex, ethnicity, smoking status, alcohol use, education, income, and genetic
principal components (PC1–PC10). Bold numbers indicate statistical significance at the α=0.05 level. Abbreviations: CI, confidence interval; HR, hazard ratio; PGSWHR, polygenic score for WHR; WHR, waist-to-hip ratio.

# **Table S2.** ICD codes used to identify NCDs.

| **NCD category** | **ICD code** |
| --- | --- |
| **Cancer** | **C00-C97** |
| Subcategories for sensitivity analysis*: |  |
| Breast | C50 |
| Lung | C34 |
| Colon and rectum | C18-C21 |
| Prostate | C61 |
| Skin (non-melanoma) | C44 |
| Stomach | C16 |
|  |  |
| **Diabetes mellitus** | **E10-E14** |
| Subcategories for sensitivity analysis: |  |
| Non-insulin-dependent diabetes mellitus | E11 |
|  |  |
| **Cardiovascular diseases** | **I00-I99** |
| Subcategories for sensitivity analysis: |  |
| Ischaemic heart diseases | I20-I25 |
| Cerebrovascular diseases | I60-I69 |
|  |  |
| **Chronic respiratory diseases** | **J30-J98** |
| Subcategories for sensitivity analysis: |  |
| Chronic obstructive pulmonary disease | J40-J44 |

* The six most common forms of cancer, according to the WHO

NCD diagnoses were derived from hospital inpatient records, using the above ICD codes, as defined by the WHO (Data Field 41270, along with data of diagnosis in Data Field 41280)):

Abbreviations: NCD, non-communicable disease

# **Table S3.** Self-reported disease codes mapped to ICD codes for NCDs

| **Outcome** | **Self report code** | **Mapped ICD code** | **Description** |
| --- | --- | --- | --- |
| CVD | 1065 | I10 | hypertension |
| CVD | 1066 | I51 | heart/cardiac problem |
| CVD | 1067 | I73 | peripheral vascular disease |
| CVD | 1068 | I82 | venous thromboembolic disease |
| CVD | 1072 | I10 | essential hypertension |
| CVD & IHD | 1074 | I20 | angina |
| CVD & IHD | 1075 | I21 | heart attack/myocardial infarction |
| CVD | 1076 | I50 | heart failure/pulmonary odema |
| CVD | 1077 | I49 | heart arrhythmia |
| CVD | 1078 | I51 | heart valve problem/heart murmur |
| CVD | 1079 | I42 | cardiomyopathy |
| CVD | 1080 | I31 | pericardial problem |
| CVD & CEREB. | 1081 | I64 | stroke |
| CVD & CEREB | 1083 | I62 | subdural haemorrhage/haematoma |
| CVD & CEREB | 1086 | I60 | subarachnoid haemorrhage |
| CVD | 1087 | I73 | leg claudication/ intermittent claudication |
| CVD | 1088 | I74 | arterial embolism |
| CVD | 1093 | I26 | pulmonary embolism +/- dvt |
| CVD | 1094 | I80 | deep venous thrombosis (dvt) |
| CVD | 1141 | I85 | oesophageal varicies |
| CVD & CEREB | 1425 | I67 | cerebral aneurysm |
| CVD | 1426 | I51 | myocarditis |
| CVD | 1471 | I48 | atrial fibrillation |
| CVD | 1479 | I00 | rheumatic fever |
| CVD | 1483 | I48 | atrial flutter |
| CVD | 1484 | I45 | wolff parkinson white / wpw syndrome |
| CVD | 1485 | I49 | irregular heart beat |
| CVD | 1486 | I49 | sick sinus syndrome |
| CVD | 1487 | I47 | svt / supraventricular tachycardia |
| CVD | 1488 | I34 | mitral valve prolapse |
| CVD | 1489 | I34 | mitral stenosis |
| CVD | 1490 | I35 | aortic stenosis |
| CVD & CEREB | 1491 | I64 | brain haemorrhage |
| CVD | 1492 | I71 | aortic aneurysm |
| CVD | 1493 | I99 | other venous/lymphatic disease |
| CVD | 1494 | I83 | varicose veins |
| CVD | 1495 | I89 | lymphoedema |
| CVD | 1561 | I73 | raynaud's phenomenon/disease |
| CVD & CEREB | 1583 | I63 | ischaemic stroke |
| CVD | 1584 | I34 | mitral valve disease |
| CVD | 1585 | I34 | mitral regurgitation / incompetence |
| CVD | 1586 | I35 | aortic valve disease |
| CVD | 1587 | I35 | aortic regurgitation / incompetence |
| CVD | 1588 | I42 | hypertrophic cardiomyopathy (hcm / hocm) |
| CVD | 1589 | I30 | pericarditis |
| CVD | 1590 | I31 | pericardial effusion |
| CVD | 1591 | I71 | aortic aneurysm rupture |
| CVD | 1592 | I71 | aortic dissection |
| CVD | 1593 | I83 | varicose ulcer |
|  |  |  |  |
| CRD | 1111 | J45 | asthma |
| CRD & COPD | 1112 | J44 | chronic obstructive airways disease/copd |
| CRD & COPD | 1113 | J44 | emphysema/chronic bronchitis |
| CRD | 1114 | J47 | bronchiectasis |
| CRD | 1115 | J84 | interstitial lung disease |
| CRD | 1117 | J98 | other respiratory problems |
| CRD | 1120 | J61 | asbestosis |
| CRD | 1121 | J84 | pulmonary fibrosis |
| CRD | 1122 | J84 | fibrosing alveolitis/unspecified alveolitis |
| CRD | 1124 | J96 | respiratory failure |
| CRD | 1126 | J93 | spontaneous pneumothorax/recurrent pneumothorax |
| CRD | 1411 | J85 | lung abscess |
| CRD & COPD | 1412 | J40 | bronchitis |
| CRD | 1413 | J34 | nasal/sinus disorder |
| CRD | 1414 | J38 | throat or larynx disorder |
| CRD | 1417 | J33 | nasal polyps |
| CRD | 1418 | J37 | chronic laryngitis |
| CRD | 1419 | J38 | vocal cord polyp |
| CRD & COPD | 1472 | J43 | emphysema |
| CRD | 1497 | J93 | pneumothorax |
| CRD | 1498 | J86 | empyema |
| CRD | 1595 | J92 | pleural plaques (not known asbestosis) |
| CRD | 1596 | J90 | pleural effusion |
|  |  |  |  |
| Diabetes | 1220 | E14 | diabetes |
| Diabetes | 1222 | E10 | type 1 diabetes |
| Diabetes & T2D | 1223 | E11 | type 2 diabetes |
|  |  |  |  |
| Cancer | All | C00-C97 | cancer |

Self-reported disease codes (Data Field 20002) mapped to ICD codes to define prevalent disease. For cancer, any self-reported cancer type (Data Field 20001) was used. Abbreviations: CEREB, cerebrovascular disease; COPD, chronic obstructive pulmonary disease; CRD, chronic respiratory disease; CVD, cardiovascular disease; IHD, ischemic heart disease; T2D, type 2 diabetes

# **Table S4.** Risk of mortality or NCD in relation to BMI and WHR and a polygenic score for BMI and WHR adjusted for extra covariates.

| **BMI** | **Mortality** | **CVD** | **Cancer** | **CRD** | **Diabetes** |
| --- | --- | --- | --- | --- | --- |
| **Separate models** |  |  |  |  |  |
| Underweight | **2.06 (1.84-2.29)** | **1.12 (1.02-1.23)** | 1.00 (0.89-1.13) | **1.57 (1.41-1.76)** | 0.94 (0.66-1.34) |
| Normal weight | Ref | Ref | Ref | Ref | Ref |
| Overweight | **0.96 (0.94-0.99)** | **1.23 (1.21-1.25)** | 1.02 (1.00-1.04) | **1.05 (1.03-1.07)** | **2.47 (2.35-2.59)** |
| Obesity | **1.27 (1.23-1.30)** | **1.71 (1.68-1.75)** | **1.07 (1.05-1.10)** | **1.35 (1.32-1.38)** | **6.84 (6.52-7.18)** |
| PGSBMI | 0.99 (0.98-1.00) | **1.11 (1.10-1.12)** | **1.02 (1.01-1.03)** | **1.02 (1.00-1.03)** | **1.30 (1.28-1.32)** |
| **Mutually adjusted models** |  |  |  |  |  |
| Underweight | **2.06 (1.85-2.30)** | **1.12 (1.02-1.24)** | **1.00 (0.89-1.13)** | **1.58 (1.41-1.77)** | 0.93 (0.65-1.33) |
| Normal weight | Ref | Ref | Ref | Ref | Ref |
| Overweight | 1.00 (0.97-1.02) | **1.21 (1.19-1.23)** | 1.01 (0.99-1.03) | **1.08 (1.05-1.11)** | **2.55 (2.42-2.69)** |
| Obesity | **1.32 (1.28-1.36)** | **1.68 (1.64-1.71)** | **1.06 (1.04-1.09)** | **1.39 (1.36-1.43)** | **7.13 (6.77-7.51)** |
| PGSBMI | **0.96 (0.95-0.97)** | **1.02 (1.01-1.03)** | 1.01 (1.00-1.02) | **0.97 (0.96-0.98)** | **0.96 (0.94-0.98)** |
| **Interaction model** |  |  |  |  |  |
| Underweight | **2.09 (1.85-2.35)** | **1.17 (1.05-1.31)** | 1.00 (0.87-1.15) | **1.61 (1.42-1.83)** | 0.83 (0.54-1.26) |
| Normal weight | Ref | Ref | Ref | Ref | Ref |
| Overweight | **0.99 (0.96-1.02)** | **1.19 (1.17-1.22)** | 1.02 (1.00-1.04) | **1.07 (1.04-1.10)** | **2.32 (2.20-2.45)** |
| Obesity | **1.33 (1.29-1.38)** | **1.69 (1.66-1.73)** | **1.07 (1.04-1.10)** | **1.40 (1.36-1.44)** | **7.25 (6.88-7.65)** |
| PGSBMI | **0.95 (0.92-0.97)** | **1.04 (1.03-1.06)** | 0.98 (0.97-1.00) | 0.98 (0.96-1.00) | **1.07 (1.02-1.13)** |
| Underweight * PGSBMI | 1.03 (0.90-1.19) | 1.10 (0.98-1.23) | 1.00 (0.86-1.15) | 1.04 (0.91-1.19) | 0.77 (0.50-1.16) |
| Overweight * PGSBMI | 1.03 (0.99-1.06) | 0.98 (0.97-1.00) | **1.03 (1.01-1.05)** | 0.98 (0.96-1.01) | 1.00 (0.94-1.05) |
| Obesity * PGSBMI | 1.00 (0.97-1.03) | **0.93 (0.91-0.95)** | **1.04 (1.02-1.07)** | **0.96 (0.94-0.99)** | **0.81 (0.77-0.85)** |
| **WHR** | **Mortality** | **CVD** | **Cancer** | **CRD** | **Diabetes** |
| **Separate models** |  |  |  |  |  |
| Normal WHR | Ref | Ref | Ref | Ref | Ref |
| High WHR | **1.25 (1.23-1.28)** | **1.34 (1.32-1.36)** | **1.09 (1.07-1.11)** | **1.25 (1.22-1.27)** | **3.35 (3.23-3.47)** |
| PGSWHR | **1.12 (1.11-1.14)** | **1.13 (1.12-1.14)** | **1.03 (1.02-1.03)** | **1.11 (1.10-1.12)** | **1.57 (1.55-1.60)** |
| **Mutually adjusted models** |  |  |  |  |  |
| Normal WHR | Ref | Ref | Ref | Ref | Ref |
| High WHR | **1.14 (1.11-1.17)** | **1.25 (1.22-1.27)** | **1.08 (1.06-1.11)** | **1.16 (1.13-1.19)** | **2.51 (2.42-2.61)** |
| PGSWHR | **1.09 (1.08-1.10)** | **1.07 (1.06-1.08)** | 1.01 (1.00-1.02) | **1.07 (1.06-1.08)** | **1.31 (1.28-1.33)** |
| **Interaction model** |  |  |  |  |  |
| Normal WHR | Ref | Ref | Ref | Ref | Ref |
| High WHR | **1.15 (1.12-1.19)** | **1.25 (1.22-1.27)** | **1.08 (1.06-1.11)** | **1.16 (1.14-1.19)** | **2.52 (2.42-2.62)** |
| PGSWHR | 1.02 (1.00-1.04) | **1.05 (1.04-1.06)** | 1.00 (0.98-1.01) | **1.04 (1.02-1.05)** | **1.28 (1.24-1.32)** |
| High * PGSWHR | **1.11 (1.08-1.13)** | **1.03 (1.02-1.05)** | 1.01 (0.99-1.03) | **1.05 (1.03-1.08)** | 1.03 (0.99-1.07) |

Hazard rate ratios (HR) and 95% confidence intervals (CI) from Cox proportional hazard models are presented for the whole study population, showing risk of mortality or NCD (non-communicable disease) in relation to body mass index (BMI) and waist-to-hip ratio (WHR) and a polygenic score for BMI and WHR. Exposures included BMI categories (underweight, normal weight (reference category), overweight, obesity), WHR categories (normal (reference category), and high), and polygenic scores for BMI (PGSBMI) and WHR (PGSWHR). Risks were estimated separately for each outcome: mortality, cardiovascular disease (CVD), cancer, chronic respiratory disease (CRD), and diabetes. Three types of models were applied. 1. Separate models including either the adiposity measure or the corresponding PGS; 2. mutually adjusted models including both the adiposity measure and its corresponding PGS; and 3. interaction models additionally including an interaction term between the adiposity measure and its corresponding PGS. All models were adjusted for age, sex, ethnicity, education, assessment center, and Townsend deprivation index. Models including a PGS were also adjusted for the first ten genetic principal components. Bold numbers indicate statistical significance at the α=0.05 level. Abbreviations: BMI, body mass index; CI, confidence interval; CRD, chronic respiratory disease; CVD, cardiovascular disease; HR, hazard rate ratio; NCD, non-communicable disease; PGSBMI, polygenic score for BMI; PGSWHR, polygenic score for WHR; WHR, waist-to-hip ratio.

# **Table S5.** Risk of mortality or NCD in relation to BMI adjusted for a polygenic score for WHR and WHR adjusted for a polygenic score for BMI.

| **BMI** | **Mortality** | **CVD** | **Cancer** | **CRD** | **Diabetes** |
| --- | --- | --- | --- | --- | --- |
| **Separate models** |  |  |  |  |  |
| Underweight | **2.45 (2.20-2.72)** | **1.16 (1.06-1.28)** | 1.04 (0.92-1.17) | **1.71 (1.53-1.90)** | 1.07 (0.77-1.51) |
| Normal weight | Ref | Ref | Ref | Ref | Ref |
| Overweight | **0.95 (0.92-0.97)** | **1.23 (1.21-1.25)** | 1.02 (1.00-1.03) | **1.05 (1.02-1.07)** | **2.48 (2.36-2.60)** |
| Obesity | **1.27 (1.24-1.31)** | **1.73 (1.70-1.76)** | **1.07 (1.05-1.09)** | **1.36 (1.33-1.39)** | **7.05 (6.72-7.38)** |
| PGSWHR | **1.14 (1.12-1.15)** | **1.13 (1.12-1.14)** | **1.03 (1.02-1.03)** | **1.11 (1.10-1.12)** | **1.61 (1.59-1.64)** |
| **Mutually adjusted models** |  |  |  |  |  |
| Underweight | **2.56 (2.30-2.84)** | **1.19 (1.08-1.30)** | 1.05 (0.93-1.18) | **1.75 (1.57-1.95)** | **1.13 (0.80-1.58)** |
| Normal weight | Ref | Ref | Ref | Ref | Ref |
| Overweight | **0.90 (0.87-0.92)** | **1.19 (1.17-1.21)** | 1.01 (0.99-1.03) | 1.01 (0.99-1.03) | **2.19 (2.09-2.30)** |
| Obesity | **1.15 (1.11-1.18)** | **1.63 (1.60-1.67)** | **1.05 (1.03-1.08)** | **1.26 (1.23-1.29)** | **5.52 (5.26-5.79)** |
| PGSWHR | **1.12 (1.11-1.13)** | **1.07 (1.06-1.07)** | **1.02 (1.01-1.03)** | **1.08 (1.07-1.09)** | **1.33 (1.31-1.35)** |
| **Interaction model** |  |  |  |  |  |
| Underweight | **2.57 (2.28-2.91)** | 1.12 (1.00-1.26) | 1.04 (0.90-1.20) | **1.60 (1.40-1.84)** | 1.01 (0.68-1.49) |
| Normal weight | Ref | Ref | Ref | Ref | Ref |
| Overweight | **0.90 (0.88-0.92)** | **1.20 (1.18-1.22)** | 1.01 (0.99-1.03) | 1.01 (0.98-1.03) | **2.15 (2.04-2.26)** |
| Obesity | **1.15 (1.12-1.19)** | **1.65 (1.61-1.68)** | **1.05 (1.03-1.08)** | **1.26 (1.23-1.29)** | **5.69 (5.42-5.98)** |
| PGSWHR | **1.10 (1.08-1.12)** | **1.05 (1.04-1.07)** | 1.01 (0.99-1.02) | **1.08 (1.07-1.10)** | **1.32 (1.27-1.38)** |
| Underweight * PGSWHR | 1.02 (0.93-1.12) | 0.94 (0.86-1.02) | 1.00 (0.89-1.11) | **0.89 (0.80-0.99)** | 0.80 (0.60-1.05) |
| Overweight * PGSWHR | **1.03 (1.00-1.06)** | **1.03 (1.01-1.05)** | 1.01 (0.99-1.03) | 1.00 (0.98-1.02) | **1.07 (1.02-1.12)** |
| Obesity * PGSWHR | 1.01 (0.99-1.04) | 1.01 (0.99-1.03) | 1.02 (0.99-1.04) | 0.99 (0.97-1.02) | 0.96 (0.92-1.01) |
| **WHR** | **Mortality** | **CVD** | **Cancer** | **CRD** | **Diabetes** |
| **Separate models** |  |  |  |  |  |
| Normal WHR | Ref | Ref | Ref | Ref | Ref |
| High WHR | **1.32 (1.29-1.35)** | **1.36 (1.34-1.38)** | **1.11 (1.09-1.13)** | **1.30 (1.28-1.33)** | **3.46 (3.35-3.59)** |
| PGSBMI | **0.99 (0.98-1.00)** | **1.11 (1.10-1.12)** | **1.02 (1.01-1.03)** | **1.02 (1.01-1.03)** | **1.31 (1.29-1.33)** |
| **Mutually adjusted models** |  |  |  |  |  |
| Normal WHR | Ref | Ref | Ref | Ref | Ref |
| High WHR | **1.34 (1.31-1.37)** | **1.32 (1.30-1.34)** | **1.10 (1.08-1.12)** | **1.31 (1.28-1.33)** | **3.27 (3.15-3.38)** |
| PGSBMI | **0.96 (0.95-0.97)** | **1.08 (1.07-1.09)** | 1.01 (1.00-1.02) | **0.99 (0.98-1.00)** | **1.17 (1.15-1.19)** |
| **Interaction model** |  |  |  |  |  |
| Normal WHR | Ref | Ref | Ref | Ref | Ref |
| High WHR | **1.34 (1.31-1.37)** | **1.32 (1.30-1.34)** | **1.10 (1.08-1.11)** | **1.31 (1.28-1.34)** | **3.41 (3.29-3.54)** |
| PGSBMI | **0.95 (0.94-0.97)** | **1.10 (1.09-1.12)** | **0.98 (0.97-0.99)** | 0.99 (0.98-1.00) | **1.35 (1.31-1.39)** |
| High * PGSBMI | 1.00 (0.98-1.03) | **0.95 (0.94-0.97)** | **1.05 (1.03-1.07)** | 0.99 (0.98-1.01) | **0.82 (0.79-0.85)** |

Hazard rate ratios (HR) and 95% confidence intervals (CI) from Cox proportional hazards models for the whole study population, showing risk of non-communicable diseases (NCDs) in relation to body mass index (BMI) and waist-to-hip ratio (WHR) and the *cross-trait* polygenic scores for WHR (PGSWHR) and BMI (PGSBMI), respectively. Exposures included BMI categories (underweight, normal weight [reference], overweight, obesity) and WHR categories (normal [reference], high), with interactions tested between each adiposity measure and the *other* adiposity’s polygenic score (BMI × PGSWHR and WHR × PGSBMI). Outcomes included mortality, cardiovascular disease (CVD), cancer, chronic respiratory disease (CRD), and diabetes. Three types of models were fitted: (1) separate models including either the adiposity measure or the cross-trait PGS; (2) mutually adjusted models including both; and (3) interaction models additionally including an interaction term. All models were adjusted for age, sex, ethnicity, education, assessment center, and Townsend deprivation index; models including a PGS were further adjusted for the first ten genetic principal components. Bold numbers indicate statistical significance at α=0.05. Abbreviations: BMI, body mass index; CI, confidence interval; CRD, chronic respiratory disease; CVD, cardiovascular disease; HR, hazard rate ratio; NCD, non-communicable disease; PGSBMI, polygenic score for BMI; PGSWHR, polygenic score for WHR; WHR, waist-to-hip ratio.

# **Table S6.** Risk of the six most common cancer subtypes in relation to BMI and WHR and a polygenic score for BMI and WHR.

| **BMI** | **Breast cancer** (N: 383,196) | **Lung cancer** (N: 378,021) | **Colorectal cancer** (N: 380,214) | **Prostate cancer** (N: 384,368) | **Skin cancer** (N: 390,638) | **Stomach cancer** (N: 374,277) |
| --- | --- | --- | --- | --- | --- | --- |
| N of events (%) | 10,029 (2.62%) | 4,854 (1.28%) | 7,047 (1.85%) | 11,201 (2.91%) | 17,471 (4.47%) | 11,10 (0.30%) |
| Mean follow up, years (SD) | 13.55 (1.89) | 13.65 (1.63) | 13.61 (1.73) | 13.56 (1.83) | 13.46 (2.02) | 13.71 (1.49) |
| **Separate models** |  |  |  |  |  |  |
| Underweight | 0.86 (0.66-1.12) | **2.41 (1.83-3.17)** | 0.68 (0.42-1.09) | 0.65 (0.37-1.15) | 1.10 (0.87-1.38) | 1.84 (0.76-4.48) |
| Normal weight | Ref | Ref | Ref | Ref | Ref | Ref |
| Overweight | **1.11 (1.06-1.17)** | **0.89 (0.83-0.95)** | **1.11 (1.04-1.17)** | 0.99 (0.95-1.04) | **0.94 (0.91-0.98)** | **1.24 (1.05-1.46)** |
| Obesity | **1.25 (1.18-1.31)** | **0.88 (0.81-0.95)** | **1.25 (1.17-1.33)** | **0.89 (0.85-0.95)** | **0.84 (0.81-0.88)** | **1.71 (1.44-2.03)** |
| PGSBMI | **1.04 (1.02-1.07)** | 1.00 (0.96-1.03) | **1.06 (1.03-1.09)** | 1.00 (0.98-1.03) | **0.97 (0.95-0.99)** | **1.14 (1.06-1.22)** |
| **Mutually adjusted models** |  |  |  |  |  |  |
| Underweight | 0.86 (0.66-1.12) | **2.41 (1.83-3.17)** | 0.68 (0.42-1.09) | 0.66 (0.37-1.16) | 1.10 (0.88-1.39) | 1.85 (0.76-4.50) |
| Normal weight | Ref | Ref | Ref | Ref | Ref | Ref |
| Overweight | **1.12 (1.06-1.18)** | **0.85 (0.79-0.92)** | **1.08 (1.01-1.15)** | 0.97 (0.93-1.03) | **0.94 (0.90-0.98)** | 1.17 (0.99-1.40) |
| Obesity | **1.25 (1.18-1.33)** | **0.84 (0.77-0.92)** | **1.21 (1.13-1.30)** | **0.88 (0.82-0.93)** | **0.84 (0.80-0.88)** | **1.60 (1.33-1.93)** |
| PGSBMI | 1.00 (0.97-1.02) | **1.04 (1.01-1.09)** | 1.03 (0.99-1.06) | 1.02 (0.99-1.05) | 1.00 (0.98-1.02) | 1.06 (0.98-1.15) |
| **Interaction model** |  |  |  |  |  |  |
| Underweight | **0.65 (0.44-0.97)** | **2.33 (1.72-3.17)** | 0.73 (0.43-1.23) | 0.60 (0.31-1.16) | 1.11 (0.86-1.44) | 1.89 (0.72-4.95) |
| Normal weight | Ref | Ref | Ref | Ref | Ref | Ref |
| Overweight | **1.13 (1.07-1.19)** | **0.85 (0.79-0.92)** | **1.09 (1.02-1.17)** | 0.98 (0.93-1.03) | **0.95 (0.92-0.99)** | 1.19 (0.99-1.42) |
| Obesity | **1.25 (1.18-1.33)** | **0.84 (0.76-0.92)** | **1.24 (1.14-1.34)** | **0.85 (0.80-0.91)** | **0.83 (0.79-0.88)** | **1.55 (1.27-1.90)** |
| PGSBMI | 0.98 (0.94-1.02) | 1.05 (0.98-1.12) | 0.98 (0.93-1.04) | 1.05 (1.00-1.10) | **0.96 (0.92-0.99)** | 1.07 (0.91-1.27) |
| Underweight * PGSBMI | **0.71 (0.52-0.97)** | 0.92 (0.66-1.29) | 1.19 (0.67-2.11) | 0.80 (0.40-1.61) | 1.01 (0.77-1.34) | 1.06 (0.36-3.11) |
| Overweight * PGSBMI | 1.02 (0.97-1.07) | 1.00 (0.92-1.08) | 1.07 (1.00-1.15) | 0.95 (0.90-1.01) | **1.05 (1.01-1.10)** | 0.96 (0.79-1.16) |
| Obesity * PGSBMI | 1.04 (0.97-1.10) | 1.00 (0.91-1.10) | 1.05 (0.97-1.13) | 1.00 (0.93-1.07) | **1.09 (1.04-1.15)** | 1.03 (0.84-1.27) |
| **WHR** | **Breast cancer** (N: 383,354) | **Lung cancer** (N: 378,174) | **Colorectal cancer** (N: 380,368) | **Prostate cancer** (N: 384,521) | **Skin cancer** (N: 390,794) | **Stomach cancer** (N: 374,431) |
| N of events (%) | 10,035 (2.62%) | 4,855 (1.28%) | 7,049 (1.85%) | 11,202 (2.91%) | 17,475 (4.47%) | 1,112 (0.30%) |
| Mean follow up, years (SD) | 13.55 (1.89) | 13.65 (1.63) | 13.61 (1.73) | 13.56 (1.83) | 13.46 (2.02) | 13.71 (1.49) |
| **Separate models** |  |  |  |  |  |  |
| Normal WHR | Ref | Ref | Ref | Ref | Ref | Ref |
| High WHR | **1.15 (1.10-1.20)** | **1.36 (1.28-1.46)** | **1.31 (1.24-1.38)** | 1.02 (0.98-1.07) | **0.95 (0.92-0.98)** | **1.51 (1.31-1.74)** |
| PGSWHR | **1.05 (1.03-1.07)** | **1.07 (1.04-1.10)** | **1.09 (1.07-1.12)** | 0.98 (0.96-1.00) | **0.95 (0.93-0.96)** | **1.18 (1.11-1.25)** |
| **Mutually adjusted models** |  |  |  |  |  |  |
| Normal WHR | Ref | Ref | Ref | Ref | Ref | Ref |
| High WHR | **1.13 (1.07-1.18)** | **1.37 (1.27-1.47)** | **1.25 (1.18-1.33)** | **1.06 (1.01-1.11)** | 1.00 (0.97-1.04) | **1.35 (1.15-1.59)** |
| PGSWHR | 1.02 (0.99-1.04) | 0.99 (0.96-1.03) | **1.04 (1.01-1.07)** | **0.97 (0.95-0.99)** | **0.95 (0.93-0.97)** | **1.10 (1.03-1.18)** |
| **Interaction model** |  |  |  |  |  |  |
| Normal WHR | Ref | Ref | Ref | Ref | Ref | Ref |
| High WHR | **1.12 (1.07-1.19)** | **1.37 (1.27-1.48)** | **1.26 (1.18-1.34)** | 1.05 (1.00-1.11) | 1.00 (0.96-1.04) | **1.35 (1.14-1.59)** |
| PGSWHR | 1.01 (0.98-1.04) | 0.97 (0.92-1.03) | 1.01 (0.97-1.06) | 0.98 (0.94-1.03) | **0.96 (0.93-0.99)** | 1.11 (0.97-1.27) |
| High * PGSWHR | 1.00 (0.96-1.05) | 1.03 (0.96-1.11) | 1.04 (0.98-1.10) | 0.98 (0.93-1.04) | 0.98 (0.94-1.01) | 0.99 (0.85-1.15) |

Hazard rate ratios (HR) and 95% confidence intervals (CI) from Cox proportional hazard models are presented for the whole study population, showing risk of the six most common cancer types in relation to body mass index (BMI) and waist-to-hip ratio (WHR) and a polygenic score for BMI and WHR. Exposures included BMI categories (underweight, normal weight (reference category), overweight, obesity), WHR categories (normal (reference category), and high), and polygenic scores for BMI (PGSBMI) and WHR (PGSWHR). Risks were estimated separately for each outcome: breast cancer, lung cancer, colorectal cancer, prostate cancer, skin cancer, and stomach cancer. Three types of models were applied. 1. Separate models including either the adiposity measure or the corresponding PGS; 2. mutually adjusted models including both the adiposity measure and its corresponding PGS; and 3. interaction models additionally including an interaction term between the adiposity measure and its corresponding PGS. All models were adjusted for age, sex, ethnicity, education, assessment center, and Townsend deprivation index. Models including a PGS were also adjusted for the first ten genetic principal components. Bold numbers indicate statistical significance at the α=0.05 level. Abbreviations: BMI, body mass index; CI, confidence interval; HR, hazard rate ratio; PGSBMI, polygenic score for BMI; PGSWHR, polygenic score for WHR; WHR, waist-to-hip ratio.

# **Table S7.** Risk of subtyped of NCDs in relation to BMI and WHR and a polygenic score for BMI and WHR.

| **BMI** | **Ischemic heart disease** (N: 237,976) | **Cerebrovascular disease** (N: 229,519) | **COPD** (N: 362,229) | **T2D** (N: 458,488) |
| --- | --- | --- | --- | --- |
| N of events (%) | 16,971 (7.13%) | 8,514 (3.71%) | 12,606 (3.48%) | 21,424 (4.67%) |
| Mean follow up, years (SD) | 13.30 (2.34) | 13.55 (1.85) | 13.47 (1.98) | 13.31 (2.23) |
| **Separate models** |  |  |  |  |
| Underweight | 1.14 (0.90-1.44) | **1.46 (1.13-1.88)** | **3.02 (2.55-3.58)** | 1.08 (0.75-1.54) |
| Normal weight | Ref | Ref | Ref | Ref |
| Overweight | **1.33 (1.28-1.38)** | **1.10 (1.04-1.15)** | **0.86 (0.82-0.90)** | **2.63 (2.50-2.76)** |
| Obesity | **1.95 (1.87-2.04)** | **1.45 (1.36-1.54)** | **1.14 (1.09-1.20)** | **7.69 (7.32-8.08)** |
| PGSBMI | **1.16 (1.14-1.18)** | **1.05 (1.03-1.08)** | 0.98 (0.96-1.00) | **1.32 (1.30-1.34)** |
| **Mutually adjusted models** |  |  |  |  |
| Underweight | 1.14 (0.90-1.44) | **1.47 (1.14-1.90)** | **3.05 (2.57-3.61)** | 1.07 (0.75-1.54) |
| Normal weight | Ref | Ref | Ref | Ref |
| Overweight | **1.28 (1.23-1.33)** | **1.09 (1.04-1.16)** | **0.86 (0.82-0.91)** | **2.72 (2.58-2.87)** |
| Obesity | **1.86 (1.78-1.95)** | **1.44 (1.35-1.54)** | **1.16 (1.10-1.22)** | **8.04 (7.62-8.47)** |
| PGSBMI | **1.05 (1.03-1.07)** | 1.00 (0.97-1.03) | 0.99 (0.96-1.01) | **0.96 (0.94-0.98)** |
| **Interaction model** |  |  |  |  |
| Underweight | 1.14 (0.88-1.49) | **1.50 (1.13-1.98)** | **2.99 (2.47-3.61)** | 0.89 (0.57-1.40) |
| Normal weight | Ref | Ref | Ref | Ref |
| Overweight | **1.26 (1.21-1.31)** | **1.10 (1.04-1.16)** | **0.86 (0.82-0.91)** | **2.44 (2.31-2.58)** |
| Obesity | **1.88 (1.78-1.97)** | **1.42 (1.32-1.53)** | **1.16 (1.09-1.23)** | **8.17 (7.73-8.62)** |
| PGSBMI | **1.09 (1.05-1.13)** | 1.01 (0.96-1.06) | 0.99 (0.94-1.03) | **1.09 (1.04-1.15)** |
| Underweight * PGSBMI | 1.00 (0.75-1.33) | 1.05 (0.76-1.45) | 0.95 (0.77-1.17) | 0.69 (0.45-1.04) |
| Overweight * PGSBMI | 0.96 (0.92-1.00) | 0.98 (0.92-1.04) | 1.00 (0.95-1.06) | 0.99 (0.93-1.05) |
| Obesity * PGSBMI | **0.91 (0.87-0.96)** | 1.02 (0.95-1.10) | 1.00 (0.94-1.06) | **0.78 (0.74-0.83)** |
| **WHR** | **Ischemic heart disease** (N: 238,018) | **Cerebrovascular disease** (N: 229,564) | **COPD** (N: 362,334) | **T2D** (N: 458,648) |
| N of events (%) | 16,978 (7.13%) | 8,524 (3.71%) | 12,619 (3.48%) | 21,456 (4.68%) |
| Mean follow up, years (SD) | 13.30 (2.34) | 13.55 (1.85) | 13.47 (1.98) | 13.31 (2.23) |
| **Separate models** |  |  |  |  |
| Normal WHR | Ref | Ref | Ref | Ref |
| High WHR | **1.56 (1.50-1.61)** | **1.34 (1.28-1.41)** | **1.47 (1.41-1.53)** | **3.64 (3.51-3.77)** |
| PGSWHR | **1.19 (1.17-1.21)** | **1.12 (1.10-1.15)** | **1.14 (1.12-1.16)** | **1.64 (1.62-1.66)** |
| **Mutually adjusted models** |  |  |  |  |
| Normal WHR | Ref | Ref | Ref | Ref |
| High WHR | **1.41 (1.36-1.47)** | **1.25 (1.18-1.32)** | **1.38 (1.32-1.45)** | **2.59 (2.49-2.69)** |
| PGSWHR | **1.09 (1.07-1.11)** | **1.06 (1.04-1.09)** | **1.05 (1.03-1.08)** | **1.37 (1.34-1.39)** |
| **Interaction model** |  |  |  |  |
| Normal WHR | Ref | Ref | Ref | Ref |
| High WHR | **1.42 (1.36-1.48)** | **1.25 (1.19-1.32)** | **1.40 (1.33-1.47)** | **2.59 (2.49-2.69)** |
| PGSWHR | **1.07 (1.04-1.10)** | **1.05 (1.01-1.09)** | 0.99 (0.95-1.03) | **1.34 (1.30-1.38)** |
| High * PGSWHR | 1.04 (1.00-1.08) | 1.02 (0.97-1.08) | **1.10 (1.05-1.15)** | 1.03 (0.99-1.06) |

Hazard rate ratios (HR) and 95% confidence intervals (CI) from Cox proportional hazard models are presented for the whole study population, showing risk of subtypes of NCDs (non-communicable disease) in relation to body mass index (BMI) and waist-to-hip ratio (WHR) and a polygenic score for BMI and WHR. Exposures included BMI categories (underweight, normal weight (reference category), overweight, obesity), WHR categories (normal (reference category), and high), and polygenic scores for BMI (PGSBMI) and WHR (PGSWHR). Risks were estimated separately for each outcome: ischemic heart disease, cerebrovascular disease, type 2 diabetes (T2D), and chronic obstructive pulmonary disease (COPD). Three types of models were applied. 1. Separate models including either the adiposity measure or the corresponding PGS; 2. mutually adjusted models including both the adiposity measure and its corresponding PGS; and 3. interaction models additionally including an interaction term between the adiposity measure and its corresponding PGS. All models were adjusted for age, sex, ethnicity, education, assessment center, and Townsend deprivation index. Models including a PGS were also adjusted for the first ten principal genetic components. Bold numbers indicate statistical significance at the α=0.05 level. Abbreviations: BMI, body mass index; CI, confidence interval; COPD, chronic obstructive pulmonary disease; HR, hazard rate ratio; NCD, non-communicable disease; PGSBMI, polygenic score for BMI; PGSWHR, polygenic score for WHR; T2D, type 2 diabetes; WHR, waist-to-hip ratio.

# **Table S8.** Sex stratified risk of mortality or NCD in relation to BMI and WHR and a polygenic score for BMI and WHR among females.

| **BMI** | **Mortality** | **CVD** | **Cancer** | **CRD** | **Diabetes** |
| --- | --- | --- | --- | --- | --- |
| **Separate models** |  |  |  |  |  |
| Underweight | **2.04 (1.78-2.35)** | **1.14 (1.02-1.27)** | **0.99 (0.86-1.13)** | **1.53 (1.34-1.75)** | 1.08 (0.72-1.61) |
| Normal weight | Ref | Ref | Ref | Ref | Ref |
| Overweight | 0.98 (0.95-1.02) | **1.25 (1.22-1.28)** | **1.03 (1.00-1.05)** | **1.09 (1.05-1.12)** | **2.53 (2.36-2.71)** |
| Obesity | **1.31 (1.26-1.36)** | **1.80 (1.75-1.84)** | **1.12 (1.09-1.16)** | **1.42 (1.38-1.47)** | **7.22 (6.77-7.71)** |
| PGSBMI | 0.99 (0.98-1.01) | **1.13 (1.12-1.14)** | **1.03 (1.01-1.04)** | **1.04 (1.02-1.05)** | **1.36 (1.32-1.39)** |
| **Mutually adjusted models** |  |  |  |  |  |
| Underweight | **2.06 (1.80-2.37)** | **1.15 (1.03-1.28)** | 0.99 (0.86-1.13) | **1.54 (1.35-1.76)** | 1.07 (0.72-1.61) |
| Normal weight | Ref | Ref | Ref | Ref | Ref |
| Overweight | 1.02 (0.98-1.06) | **1.23 (1.20-1.26)** | 1.02 (0.99-1.05) | **1.11 (1.07-1.15)** | **2.65 (2.47-2.85)** |
| Obesity | **1.37 (1.31-1.43)** | **1.76 (1.71-1.81)** | **1.12 (1.08-1.15)** | **1.46 (1.41-1.52)** | **7.65 (7.13-8.21)** |
| PGSBMI | **0.95 (0.93-0.97)** | **1.02 (1.01-1.03)** | 1.01 (0.99-1.02) | **0.97 (0.96-0.99)** | **0.94 (0.92-0.97)** |
| **Interaction model** |  |  |  |  |  |
| Underweight | **2.08 (1.79-2.41)** | **1.24 (1.10-1.40)** | 1.03 (0.87-1.21) | **1.57 (1.35-1.83)** | 1.01 (0.63-1.60) |
| Normal weight | Ref | Ref | Ref | Ref | Ref |
| Overweight | 1.01 (0.97-1.06) | **1.21 (1.18-1.24)** | 1.02 (0.99-1.05) | **1.09 (1.06-1.13)** | **2.36 (2.19-2.55)** |
| Obesity | **1.38 (1.32-1.45)** | **1.79 (1.74-1.84)** | **1.11 (1.07-1.15)** | **1.47 (1.42-1.53)** | **7.70 (7.16-8.29)** |
| PGSBMI | 0.97 (0.94-1.01) | **1.04 (1.02-1.06)** | 1.01 (0.98-1.03) | 1.00 (0.97-1.03) | **1.08 (1.01-1.16)** |
| Underweight * PGSBMI | 1.03 (0.87-1.21) | **1.18 (1.03-1.34)** | 1.08 (0.92-1.27) | 1.05 (0.90-1.22) | 0.86 (0.54-1.38) |
| Overweight * PGSBMI | 0.97 (0.93-1.02) | 1.00 (0.98-1.03) | 1.00 (0.97-1.03) | 0.97 (0.94-1.01) | 0.99 (0.91-1.07) |
| Obesity * PGSBMI | **0.95 (0.91-1.00)** | **0.93 (0.90-0.96)** | 1.00 (0.97-1.04) | **0.94 (0.90-0.97)** | **0.78 (0.73-0.84)** |
| **WHR** | **Mortality** | **CVD** | **Cancer** | **CRD** | **Diabetes** |
| **Separate models** |  |  |  |  |  |
| Normal WHR | Ref | Ref | Ref | Ref | Ref |
| High WHR | **1.37 (1.33-1.41)** | **1.38 (1.35-1.41)** | **1.12 (1.09-1.14)** | **1.33 (1.29-1.36)** | **3.51 (3.37-3.66)** |
| PGSWHR | **1.13 (1.11-1.14)** | **1.13 (1.12-1.15)** | **1.04 (1.03-1.05)** | **1.11 (1.10-1.12)** | **1.66 (1.63-1.69)** |
| **Mutually adjusted models** |  |  |  |  |  |
| Normal WHR | Ref | Ref | Ref | Ref | Ref |
| High WHR | **1.29 (1.24-1.33)** | **1.28 (1.25-1.31)** | **1.10 (1.07-1.13)** | **1.26 (1.22-1.30)** | **2.59 (2.46-2.72)** |
| PGSWHR | **1.05 (1.03-1.07)** | **1.07 (1.06-1.08)** | 1.01 (1.00-1.03) | **1.04 (1.03-1.06)** | **1.31 (1.28-1.34)** |
| **Interaction model** |  |  |  |  |  |
| Normal WHR | Ref | Ref | Ref | Ref | Ref |
| High WHR | **1.28 (1.23-1.33)** | **1.28 (1.25-1.31)** | **1.10 (1.06-1.13)** | **1.27 (1.23-1.31)** | **2.64 (2.51-2.78)** |
| PGSWHR | **1.04 (1.01-1.07)** | **1.07 (1.06-1.09)** | 1.01 (0.99-1.03) | **1.05 (1.03-1.07)** | **1.38 (1.33-1.43)** |
| High * PGSWHR | 1.03 (0.99-1.07) | 0.99 (0.96-1.01) | 1.00 (0.98-1.03) | 0.98 (0.95-1.01) | **0.92 (0.88-0.96)** |

Hazard rate ratios (HR) and 95% confidence intervals (CI) from Cox proportional hazard models are presented within the female study population, showing risk of mortality or NCD (non-communicable disease) in relation to body mass index (BMI) and waist-to-hip ratio (WHR) and a polygenic score for BMI and WHR. Exposures included BMI categories (underweight, normal weight (reference category), overweight, obesity), WHR categories (normal (reference category), and high), and polygenic scores for BMI (PGSBMI) and WHR (PGSWHR). Risks were estimated separately for each outcome: mortality, cardiovascular disease (CVD), cancer, chronic respiratory disease (CRD), and diabetes. Three types of models were applied. 1. Separate models including either the adiposity measure or the corresponding PGS; 2. mutually adjusted models including both the adiposity measure and its corresponding PGS; and 3. interaction models additionally including an interaction term between the adiposity measure and its corresponding PGS. All models were adjusted for age, sex, ethnicity, education, assessment center, and Townsend deprivation index. Models including a PGS were also adjusted for the first ten genetic principal components. Bold numbers indicate statistical significance at the α=0.05 level. Abbreviations: BMI, body mass index; CI, confidence interval; CRD, chronic respiratory disease; CVD, cardiovascular disease; HR, hazard rate ratio; NCD, non-communicable disease; PGSBMI, polygenic score for BMI; PGSWHR, polygenic score for WHR; WHR, waist-to-hip ratio.

# **Table S9.** Sex stratified risk of mortality or NCD in relation to BMI and WHR and a polygenic score for BMI and WHR among males.

| **BMI** | **Mortality** | **CVD** | **Cancer** | **CRD** | **Diabetes** |
| --- | --- | --- | --- | --- | --- |
| **Separate models** |  |  |  |  |  |
| Underweight | **3.38 (2.87-3.97)** | **1.26 (1.05-1.52)** | 1.23 (0.98-1.54) | **2.31 (1.90-2.81)** | 1.09 (0.58-2.03) |
| Normal weight | Ref | Ref | Ref | Ref | Ref |
| Overweight | **0.93 (0.90-0.96)** | **1.20 (1.17-1.23)** | 1.01 (0.99-1.04) | 1.01 (0.98-1.04) | **2.41 (2.25-2.58)** |
| Obesity | **1.25 (1.21-1.30)** | **1.65 (1.61-1.70)** | **1.04 (1.01-1.07)** | **1.29 (1.25-1.34)** | **6.84 (6.39-7.32)** |
| PGSBMI | 0.99 (0.97-1.00) | **1.09 (1.08-1.10)** | 1.01 (1.00-1.02) | 1.00 (0.98-1.01) | **1.27 (1.24-1.29)** |
| **Mutually adjusted models** |  |  |  |  |  |
| Underweight | **3.38 (2.87-3.97)** | **1.26 (1.05-1.52)** | 1.22 (0.98-1.54) | **2.32 (1.90-2.82)** | 1.08 (0.58-2.02) |
| Normal weight | Ref | Ref | Ref | Ref | Ref |
| Overweight | **0.96 (0.92-0.99)** | **1.18 (1.15-1.21)** | 1.01 (0.98-1.04) | **1.04 (1.01-1.08)** | **2.48 (2.31-2.66)** |
| Obesity | **1.30 (1.25-1.35)** | **1.62 (1.57-1.67)** | 1.03 (0.99-1.06) | **1.34 (1.29-1.39)** | **7.09 (6.60-7.61)** |
| PGSBMI | **0.96 (0.95-0.98)** | **1.02 (1.00-1.03)** | 1.01 (0.99-1.02) | **0.96 (0.95-0.98)** | **0.97 (0.95-1.00)** |
| **Interaction model** |  |  |  |  |  |
| Underweight | **3.29 (2.74-3.96)** | 1.22 (0.98-1.50) | 1.09 (0.83-1.44) | **2.39 (1.92-2.98)** | 0.80 (0.35-1.84) |
| Normal weight | Ref | Ref | Ref | Ref | Ref |
| Overweight | **0.95 (0.92-0.99)** | **1.16 (1.13-1.19)** | 1.01 (0.98-1.04) | 1.04 (1.00-1.07) | **2.28 (2.12-2.46)** |
| Obesity | **1.32 (1.27-1.38)** | **1.62 (1.57-1.68)** | 1.02 (0.98-1.05) | **1.34 (1.29-1.39)** | **7.27 (6.75-7.82)** |
| PGSBMI | **0.93 (0.89-0.96)** | **1.05 (1.03-1.08)** | 1.00 (0.97-1.02) | 0.97 (0.94-1.01) | 1.07 (0.99-1.15) |
| Underweight * PGSBMI | 0.95 (0.77-1.16) | 0.92 (0.74-1.15) | 0.79 (0.60-1.04) | 1.07 (0.84-1.35) | 0.57 (0.27-1.20) |
| Overweight * PGSBMI | **1.06 (1.02-1.11)** | **0.97 (0.94-0.99)** | 1.01 (0.98-1.04) | 0.99 (0.95-1.02) | 1.01 (0.93-1.09) |
| Obesity * PGSBMI | 1.03 (0.99-1.08) | **0.93 (0.90-0.96)** | 1.04 (1.00-1.08) | 0.98 (0.94-1.02) | **0.82 (0.76-0.88)** |
| **WHR** | **Mortality** | **CVD** | **Cancer** | **CRD** | **Diabetes** |
| **Separate models** |  |  |  |  |  |
| Normal WHR | Ref | Ref | Ref | Ref | Ref |
| High WHR | **1.28 (1.24-1.32)** | **1.38 (1.35-1.41)** | **1.10 (1.07-1.12)** | **1.27 (1.24-1.31)** | **3.35 (3.16-3.55)** |
| PGSWHR | **1.14 (1.13-1.16)** | **1.13 (1.12-1.14)** | **1.01 (1.00-1.02)** | **1.12 (1.10-1.13)** | **1.57 (1.54-1.60)** |
| **Mutually adjusted models** |  |  |  |  |  |
| Normal WHR | Ref | Ref | Ref | Ref | Ref |
| High WHR | **1.14 (1.10-1.18)** | **1.25 (1.22-1.28)** | **1.11 (1.08-1.14)** | **1.18 (1.14-1.22)** | **2.41 (2.26-2.57)** |
| PGSWHR | **1.11 (1.10-1.13)** | **1.07 (1.06-1.08)** | 0.99 (0.98-1.00) | **1.08 (1.06-1.09)** | **1.38 (1.36-1.41)** |
| **Interaction model** |  |  |  |  |  |
| Normal WHR | Ref | Ref | Ref | Ref | Ref |
| High WHR | **1.20 (1.16-1.25)** | **1.29 (1.25-1.32)** | **1.12 (1.09-1.16)** | **1.23 (1.18-1.27)** | **2.60 (2.43-2.79)** |
| PGSWHR | 1.00 (0.97-1.04) | 1.00 (0.98-1.03) | **0.96 (0.94-0.99)** | 0.99 (0.96-1.02) | **1.13 (1.06-1.21)** |
| High * PGSWHR | **1.14 (1.09-1.18)** | **1.09 (1.06-1.12)** | **1.03 (1.00-1.07)** | **1.11 (1.07-1.15)** | **1.26 (1.17-1.34)** |

Hazard rate ratios (HR) and 95% confidence intervals (CI) from Cox proportional hazard models are presented within the male study population, showing risk of mortality or NCD (non-communicable disease) in relation to body mass index (BMI) and waist-to-hip ratio (WHR) and a polygenic score for BMI and WHR. Exposures included BMI categories (underweight, normal weight (reference category), overweight, obesity), WHR categories (normal (reference category), and high), and polygenic scores for BMI (PGSBMI) and WHR (PGSWHR). Risks were estimated separately for each outcome: mortality, cardiovascular disease (CVD), cancer, chronic respiratory disease (CRD), and diabetes. Three types of models were applied. 1. Separate models including either the adiposity measure or the corresponding PGS; 2. mutually adjusted models including both the adiposity measure and its corresponding PGS; and 3. interaction models additionally including an interaction term between the adiposity measure and its corresponding PGS. All models were adjusted for age, sex, ethnicity, education, assessment center, and Townsend deprivation index. Models including a PGS were also adjusted for the first ten genetic principal components. Bold numbers indicate statistical significance at the α=0.05 level. Abbreviations: BMI, body mass index; CI, confidence interval; CRD, chronic respiratory disease; CVD, cardiovascular disease; HR, hazard rate ratio; NCD, non-communicable disease; PGSBMI, polygenic score for BMI; PGSWHR, polygenic score for WHR; WHR, waist-to-hip ratio.

# **Table S10.** Age stratified risk of mortality or NCD in relation to BMI and WHR and a polygenic score for BMI and WHR in midlife (ages 49–59 at baseline).

| **BMI** | **Mortality** | **CVD** | **Cancer** | **CRD** | **Diabetes** |
| --- | --- | --- | --- | --- | --- |
| **Separate models** |  |  |  |  |  |
| Underweight | **2.67 (2.26-3.15)** | **1.15 (1.01-1.32)** | 1.06 (0.90-1.25) | **1.66 (1.42-1.95)** | 1.02 (0.61-1.70) |
| Normal weight | Ref | Ref | Ref | Ref | Ref |
| Overweight | **0.91 (0.87-0.95)** | **1.27 (1.24-1.30)** | 1.00 (0.98-1.03) | **1.08 (1.05-1.12)** | **2.67 (2.47-2.88)** |
| Obesity | **1.27 (1.21-1.33)** | **1.89 (1.85-1.94)** | **1.05 (1.01-1.08)** | **1.42 (1.37-1.47)** | **8.82 (8.21-9.49)** |
| PGSBMI | 1.00 (0.98-1.02) | **1.14 (1.13-1.15)** | 1.00 (0.99-1.02) | **1.03 (1.02-1.05)** | **1.40 (1.37-1.43)** |
| **Mutually adjusted models** |  |  |  |  |  |
| Underweight | **2.69 (2.28-3.17)** | **1.15 (1.01-1.32)** | 1.07 (0.91-1.26) | **1.67 (1.42-1.96)** | 1.01 (0.61-1.69) |
| Normal weight | Ref | Ref | Ref | Ref | Ref |
| Overweight | **0.93 (0.88-0.97)** | **1.25 (1.22-1.28)** | 1.01 (0.97-1.04) | **1.11 (1.07-1.15)** | **2.69 (2.48-2.91)** |
| Obesity | **1.30 (1.23-1.37)** | **1.85 (1.80-1.90)** | **1.05 (1.01-1.09)** | **1.46 (1.41-1.52)** | **8.94 (8.28-9.66)** |
| PGSBMI | **0.97 (0.95-1.00)** | **1.02 (1.01-1.04)** | 1.00 (0.98-1.01) | **0.97 (0.95-0.99)** | 0.99 (0.96-1.02) |
| **Interaction model** |  |  |  |  |  |
| Underweight | **2.80 (2.21-3.54)** | **1.24 (1.02-1.50)** | 1.13 (0.88-1.44) | **1.77 (1.41-2.22)** | **0.80 (0.38-1.68)** |
| Normal weight | Ref | Ref | Ref | Ref | Ref |
| Overweight | **0.94 (0.89-1.00)** | **1.25 (1.21-1.29)** | 1.02 (0.98-1.06) | **1.08 (1.04-1.13)** | **2.41 (2.19-2.65)** |
| Obesity | **1.32 (1.24-1.40)** | **1.86 (1.80-1.92)** | **1.07 (1.02-1.11)** | **1.43 (1.37-1.50)** | **8.31 (7.58-9.11)** |
| PGSBMI | **0.95 (0.91-1.00)** | 1.02 (1.00-1.05) | 0.98 (0.95-1.01) | 1.00 (0.96-1.03) | **1.13 (1.04-1.22)** |
| Underweight * PGSBMI | 1.05 (0.85-1.30) | 1.09 (0.92-1.28) | 1.06 (0.86-1.31) | 1.07 (0.88-1.30) | 0.74 (0.40-1.37) |
| Overweight * PGSBMI | 1.03 (0.98-1.09) | 1.02 (0.99-1.05) | 1.03 (0.99-1.07) | 0.97 (0.93-1.01) | 0.99 (0.91-1.09) |
| Obesity * PGSBMI | 1.03 (0.97-1.09) | **0.96 (0.93-0.99)** | 1.02 (0.98-1.06) | **0.95 (0.91-0.99)** | **0.80 (0.73-0.87)** |
| **WHR** | **Mortality** | **CVD** | **Cancer** | **CRD** | **Diabetes** |
| **Separate models** |  |  |  |  |  |
| Normal WHR | Ref | Ref | Ref | Ref | Ref |
| High WHR | **1.44 (1.38-1.50)** | **1.45 (1.42-1.48)** | **1.09 (1.06-1.11)** | **1.36 (1.32-1.40)** | **4.05 (3.85-4.26)** |
| PGSWHR | **1.15 (1.13-1.17)** | **1.15 (1.14-1.17)** | **1.02 (1.01-1.03)** | **1.13 (1.12-1.15)** | **1.69 (1.65-1.72)** |
| **Mutually adjusted models** |  |  |  |  |  |
| Normal WHR | Ref | Ref | Ref | Ref | Ref |
| High WHR | **1.32 (1.26-1.39)** | **1.34 (1.31-1.37)** | **1.08 (1.05-1.11)** | **1.26 (1.21-1.30)** | **2.86 (2.71-3.03)** |
| PGSWHR | **1.07 (1.05-1.10)** | **1.08 (1.06-1.09)** | 1.00 (0.99-1.02) | **1.07 (1.06-1.09)** | **1.38 (1.34-1.41)** |
| **Interaction model** |  |  |  |  |  |
| Normal WHR | Ref | Ref | Ref | Ref | Ref |
| High WHR | **1.33 (1.27-1.39)** | **1.34 (1.31-1.37)** | **1.08 (1.05-1.11)** | **1.25 (1.21-1.30)** | **2.86 (2.70-3.03)** |
| PGSWHR | 1.02 (0.99-1.06) | **1.06 (1.04-1.08)** | 1.00 (0.98-1.02) | **1.05 (1.02-1.07)** | **1.37 (1.31-1.43)** |
| High * PGSWHR | **1.09 (1.04-1.13)** | **1.03 (1.00-1.05)** | 1.01 (0.98-1.04) | **1.05 (1.02-1.08)** | 1.01 (0.96-1.06) |

Hazard rate ratios (HR) and 95% confidence intervals (CI) from Cox proportional hazard models are presented within the midlife study population, showing risk of mortality or NCD (non-communicable disease) in relation to body mass index (BMI) and waist-to-hip ratio (WHR) and a polygenic score for BMI and WHR. Exposures included BMI categories (underweight, normal weight (reference category), overweight, obesity), WHR categories (normal (reference category), and high), and polygenic scores for BMI (PGSBMI) and WHR (PGSWHR). Risks were estimated separately for each outcome: mortality, cardiovascular disease (CVD), cancer, chronic respiratory disease (CRD), and diabetes. Three types of models were applied. 1. Separate models including either the adiposity measure or the corresponding PGS; 2. mutually adjusted models including both the adiposity measure and its corresponding PGS; and 3. interaction models additionally including an interaction term between the adiposity measure and its corresponding PGS. All models were adjusted for age, sex, ethnicity, education, assessment center, and Townsend deprivation index. Models including a PGS were also adjusted for the first ten genetic principal components. Bold numbers indicate statistical significance at the α=0.05 level. Abbreviations: BMI, body mass index; CI, confidence interval; CRD, chronic respiratory disease; CVD, cardiovascular disease; HR, hazard rate ratio; NCD, non-communicable disease; PGSBMI, polygenic score for BMI; PGSWHR, polygenic score for WHR; WHR, waist-to-hip ratio.

# **Table S11.** Age stratified risk of mortality or NCD in relation to BMI and WHR and a polygenic score for BMI and WHR in late life (ages 60–69 at baseline).

| **BMI** | **Mortality** | **CVD** | **Cancer** | **CRD** | **Diabetes** |
| --- | --- | --- | --- | --- | --- |
| **Separate models** |  |  |  |  |  |
| Underweight | **2.28 (1.99-2.61)** | **1.17 (1.03-1.33)** | 1.01 (0.85-1.19) | **1.75 (1.50-2.04)** | 1.14 (0.72-1.79) |
| Normal weight | Ref | Ref | Ref | Ref | Ref |
| Overweight | **0.97 (0.94-0.99)** | **1.19 (1.16-1.21)** | **1.04 (1.01-1.06)** | 1.03 (1.00-1.06) | **2.33 (2.19-2.48)** |
| Obesity | **1.28 (1.24-1.32)** | **1.57 (1.53-1.61)** | **1.10 (1.07-1.13)** | **1.32 (1.28-1.36)** | **5.86 (5.51-6.23)** |
| PGSBMI | 1.01 (0.99-1.02) | **1.09 (1.08-1.10)** | **1.02 (1.01-1.03)** | **1.03 (1.02-1.05)** | **1.30 (1.28-1.33)** |
| **Mutually adjusted models** |  |  |  |  |  |
| Underweight | **2.28 (1.99-2.62)** | **1.17 (1.03-1.34)** | 1.01 (0.85-1.20) | **1.75 (1.51-2.04)** | 1.13 (0.72-1.78) |
| Normal weight | Ref | Ref | Ref | Ref | Ref |
| Overweight | 0.98 (0.95-1.01) | **1.17 (1.14-1.20)** | 1.03 (1.00-1.05) | 1.03 (1.00-1.06) | **2.36 (2.21-2.52)** |
| Obesity | **1.31 (1.26-1.35)** | **1.55 (1.50-1.59)** | **1.09 (1.06-1.12)** | **1.32 (1.28-1.37)** | **5.96 (5.57-6.36)** |
| PGSBMI | **0.98 (0.96-0.99)** | 1.01 (1.00-1.03) | 1.01 (1.00-1.02) | 0.99 (0.98-1.01) | 0.99 (0.96-1.01) |
| **Interaction model** |  |  |  |  |  |
| Underweight | **2.30 (2.00-2.63)** | **1.19 (1.05-1.36)** | 1.00 (0.84-1.19) | **1.76 (1.51-2.05)** | 1.04 (0.63-1.70) |
| Normal weight | Ref | Ref | Ref | Ref | Ref |
| Overweight | 0.98 (0.95-1.01) | **1.17 (1.15-1.20)** | **1.03 (1.00-1.06)** | 1.03 (1.00-1.07) | **2.25 (2.10-2.41)** |
| Obesity | **1.31 (1.26-1.37)** | **1.54 (1.49-1.60)** | **1.08 (1.04-1.11)** | **1.32 (1.27-1.37)** | **6.29 (5.87-6.74)** |
| PGSBMI | 0.98 (0.95-1.01) | 1.01 (0.99-1.04) | 1.01 (0.99-1.04) | 0.99 (0.96-1.02) | 0.99 (0.92-1.06) |
| Underweight * PGSBMI | 1.07 (0.88-1.29) | 1.18 (0.97-1.43) | 0.95 (0.75-1.20) | 1.04 (0.84-1.28) | 0.67 (0.35-1.27) |
| Overweight * PGSBMI | 1.00 (0.96-1.04) | 1.00 (0.97-1.03) | 0.99 (0.96-1.02) | 1.00 (0.97-1.04) | 1.06 (0.98-1.15) |
| Obesity * PGSBMI | 0.99 (0.95-1.03) | 1.00 (0.97-1.04) | 1.01 (0.97-1.05) | 1.00 (0.96-1.05) | 0.94 (0.86-1.02) |
| **WHR** | **Mortality** | **CVD** | **Cancer** | **CRD** | **Diabetes** |
| **Separate models** |  |  |  |  |  |
| Normal WHR | Ref | Ref | Ref | Ref | Ref |
| High WHR | **1.29 (1.25-1.32)** | **1.28 (1.25-1.30)** | **1.12 (1.10-1.15)** | **1.28 (1.24-1.31)** | **3.05 (2.91-3.20)** |
| PGSWHR | **1.13 (1.12-1.15)** | **1.11 (1.10-1.12)** | **1.03 (1.02-1.04)** | **1.10 (1.09-1.11)** | **1.56 (1.53-1.59)** |
| **Mutually adjusted models** |  |  |  |  |  |
| Normal WHR | Ref | Ref | Ref | Ref | Ref |
| High WHR | **1.16 (1.13-1.20)** | **1.20 (1.17-1.22)** | **1.12 (1.09-1.15)** | **1.20 (1.17-1.24)** | **2.23 (2.12-2.35)** |
| PGSWHR | **1.09 (1.08-1.11)** | **1.06 (1.05-1.07)** | **1.00 (0.99-1.01)** | **1.05 (1.04-1.07)** | **1.33 (1.30-1.36)** |
| **Interaction model** |  |  |  |  |  |
| Normal WHR | Ref | Ref | Ref | Ref | Ref |
| High WHR | **1.18 (1.14-1.22)** | **1.20 (1.17-1.23)** | **1.12 (1.09-1.15)** | **1.21 (1.17-1.25)** | **2.24 (2.13-2.36)** |
| PGSWHR | 1.02 (1.00-1.05) | **1.05 (1.03-1.06)** | 1.00 (0.98-1.01) | 1.02 (1.00-1.04) | **1.27 (1.21-1.32)** |
| High * PGSWHR | **1.10 (1.07-1.14)** | **1.03 (1.01-1.05)** | 1.01 (0.98-1.03) | **1.05 (1.02-1.08)** | **1.07 (1.02-1.12)** |

Hazard rate ratios (HR) and 95% confidence intervals (CI) from Cox proportional hazard models are presented within the late life study population, showing risk of mortality or NCD (non-communicable disease) in relation to body mass index (BMI) and waist-to-hip ratio (WHR) and a polygenic score for BMI and WHR. Exposures included BMI categories (underweight, normal weight (reference category), overweight, obesity), WHR categories (normal (reference category), and high), and polygenic scores for BMI (PGSBMI) and WHR (PGSWHR). Risks were estimated separately for each outcome: mortality, cardiovascular disease (CVD), cancer, chronic respiratory disease (CRD), and diabetes. Three types of models were applied. 1. Separate models including either the adiposity measure or the corresponding PGS; 2. mutually adjusted models including both the adiposity measure and its corresponding PGS; and 3. interaction models additionally including an interaction term between the adiposity measure and its corresponding PGS. All models were adjusted for age, sex, ethnicity, education, assessment center, and Townsend deprivation index. Models including a PGS were also adjusted for the first ten genetic principal components. Bold numbers indicate statistical significance at the α=0.05 level. Abbreviations: BMI, body mass index; CI, confidence interval; CRD, chronic respiratory disease; CVD, cardiovascular disease; HR, hazard rate ratio; NCD, non-communicable disease; PGSBMI, polygenic score for BMI; PGSWHR, polygenic score for WHR; WHR, waist-to-hip ratio.

# **Table S12.** Ancestry stratified risk of mortality or NCD in relation to BMI and WHR and a polygenic score for BMI and WHR among individuals of European ancestry.

| **BMI** | **Mortality** | **CVD** | **Cancer** | **CRD** | **Diabetes** |
| --- | --- | --- | --- | --- | --- |
| **Separate models** |  |  |  |  |  |
| Underweight | **2.45 (2.19-2.74)** | **1.21 (1.10-1.34)** | 1.08 (0.95-1.22) | **1.78 (1.58-2.01)** | 1.31 (0.91-1.88) |
| Normal weight | Ref | Ref | Ref | Ref | Ref |
| Overweight | **0.95 (0.92-0.97)** | **1.23 (1.21-1.25)** | **1.03 (1.01-1.05)** | **1.05 (1.02-1.07)** | **2.56 (2.42-2.70)** |
| Obesity | **1.28 (1.25-1.32)** | **1.73 (1.69-1.76)** | **1.08 (1.06-1.10)** | **1.35 (1.32-1.38)** | **7.54 (7.15-7.96)** |
| PGSBMI | 0.99 (0.98-1.00) | **1.11 (1.10-1.12)** | **1.02 (1.01-1.03)** | **1.01 (1.00-1.02)** | **1.32 (1.30-1.35)** |
| **Mutually adjusted models** |  |  |  |  |  |
| Underweight | **2.45 (2.19-2.75)** | **1.22 (1.10-1.34)** | 1.08 (0.95-1.22) | **1.79 (1.59-2.02)** | 1.31 (0.91-1.88) |
| Normal weight | Ref | Ref | Ref | Ref | Ref |
| Overweight | 0.98 (0.95-1.01) | **1.21 (1.19-1.23)** | 1.02 (0.99-1.04) | **1.08 (1.05-1.10)** | **2.63 (2.48-2.79)** |
| Obesity | **1.33 (1.29-1.38)** | **1.69 (1.65-1.73)** | **1.07 (1.04-1.09)** | **1.39 (1.36-1.43)** | **7.80 (7.37-8.26)** |
| PGSBMI | **0.96 (0.95-0.97)** | **1.02 (1.01-1.03)** | 1.01 (1.00-1.02) | **0.96 (0.95-0.98)** | **0.97 (0.95-0.99)** |
| **Interaction model** |  |  |  |  |  |
| Underweight | **2.47 (2.18-2.79)** | **1.26 (1.13-1.42)** | 1.09 (0.94-1.26) | **1.82 (1.59-2.08)** | 1.20 (0.78-1.85) |
| Normal weight | Ref | Ref | Ref | Ref | Ref |
| Overweight | 0.97 (0.94-1.00) | **1.19 (1.17-1.21)** | **1.03 (1.01-1.05)** | **1.07 (1.04-1.10)** | **2.40 (2.25-2.55)** |
| Obesity | **1.36 (1.31-1.40)** | **1.71 (1.67-1.75)** | **1.07 (1.04-1.10)** | **1.40 (1.36-1.44)** | **7.89 (7.42-8.38)** |
| PGSBMI | **0.95 (0.92-0.98)** | **1.04 (1.03-1.06)** | **0.97 (0.95-0.99)** | 0.98 (0.96-1.00) | **1.06 (1.00-1.13)** |
| Underweight * PGSBMI | 1.01 (0.88-1.17) | 1.08 (0.96-1.22) | 1.02 (0.88-1.19) | 1.03 (0.90-1.19) | 0.83 (0.54-1.29) |
| Overweight * PGSBMI | 1.03 (1.00-1.06) | 0.99 (0.97-1.01) | **1.05 (1.02-1.07)** | 0.99 (0.96-1.01) | 1.01 (0.95-1.08) |
| Obesity * PGSBMI | 0.99 (0.96-1.03) | **0.93 (0.90-0.95)** | **1.06 (1.03-1.09)** | **0.97 (0.94-1.00)** | **0.82 (0.77-0.87)** |
| **WHR** | **Mortality** | **CVD** | **Cancer** | **CRD** | **Diabetes** |
| **Separate models** |  |  |  |  |  |
| Normal WHR | Ref | Ref | Ref | Ref | Ref |
| High WHR | **1.33 (1.30-1.36)** | **1.35 (1.33-1.38)** | **1.11 (1.09-1.13)** | **1.31 (1.28-1.33)** | **3.64 (3.50-3.78)** |
| PGSWHR | **1.14 (1.13-1.15)** | **1.13 (1.13-1.14)** | **1.02 (1.02-1.03)** | **1.11 (1.10-1.13)** | **1.67 (1.64-1.69)** |
| **Mutually adjusted models** |  |  |  |  |  |
| Normal WHR | Ref | Ref | Ref | Ref | Ref |
| High WHR | **1.20 (1.17-1.24)** | **1.25 (1.23-1.28)** | **1.11 (1.09-1.14)** | **1.22 (1.19-1.25)** | **2.53 (2.42-2.64)** |
| PGSWHR | **1.09 (1.08-1.11)** | **1.07 (1.06-1.08)** | 1.00 (0.99-1.01) | **1.06 (1.05-1.07)** | **1.39 (1.36-1.41)** |
| **Interaction model** |  |  |  |  |  |
| Normal WHR | Ref | Ref | Ref | Ref | Ref |
| High WHR | **1.22 (1.19-1.25)** | **1.25 (1.23-1.28)** | **1.12 (1.09-1.14)** | **1.22 (1.19-1.25)** | **2.53 (2.42-2.64)** |
| PGSWHR | **1.02 (1.00-1.05)** | **1.06 (1.04-1.07)** | 0.99 (0.98-1.01) | **1.03 (1.01-1.05)** | **1.35 (1.31-1.41)** |
| High * PGSWHR | **1.10 (1.07-1.13)** | **1.03 (1.01-1.05)** | 1.01 (0.99-1.03) | **1.06 (1.03-1.08)** | 1.03 (0.99-1.08) |

Hazard rate ratios (HR) and 95% confidence intervals (CI) from Cox proportional hazard models are presented within the European genetic ancestry study population, showing risk of mortality or NCD (non-communicable disease) in relation to body mass index (BMI) and waist-to-hip ratio (WHR) and a polygenic score for BMI and WHR. Exposures included BMI categories (underweight, normal weight (reference category), overweight, obesity), WHR categories (normal (reference category), and high), and polygenic scores for BMI (PGSBMI) and WHR (PGSWHR). Risks were estimated separately for each outcome: mortality, cardiovascular disease (CVD), cancer, chronic respiratory disease (CRD), and diabetes. Three types of models were applied. 1. Separate models including either the adiposity measure or the corresponding PGS; 2. mutually adjusted models including both the adiposity measure and its corresponding PGS; and 3. interaction models additionally including an interaction term between the adiposity measure and its corresponding PGS. All models were adjusted for age, sex, ethnicity, education, assessment center, and Townsend deprivation index. Models including a PGS were also adjusted for the first ten genetic principal components. Bold numbers indicate statistical significance at the α=0.05 level. Abbreviations: BMI, body mass index; CI, confidence interval; CRD, chronic respiratory disease; CVD, cardiovascular disease; HR, hazard rate ratio; NCD, non-communicable disease; PGSBMI, polygenic score for BMI; PGSWHR, polygenic score for WHR; WHR, waist-to-hip ratio.

# **Table S13.** Ancestry stratified risk of mortality or NCD in relation to BMI and WHR and a polygenic score for BMI and WHR among individuals of non-European ancestry.

| **BMI** | **Mortality** | **CVD** | **Cancer** | **CRD** | **Diabetes** |
| --- | --- | --- | --- | --- | --- |
| **Separate models** |  |  |  |  |  |
| Underweight | **2.43 (1.85-3.20)** | 0.93 (0.73-1.19) | 0.82 (0.59-1.15) | **1.35 (1.01-1.81)** | 0.44 (0.17-1.19) |
| Normal weight | Ref | Ref | Ref | Ref | Ref |
| Overweight | 0.95 (0.89-1.02) | **1.23 (1.18-1.28)** | 0.96 (0.92-1.01) | 1.05 (1.00-1.11) | **2.23 (2.02-2.46)** |
| Obesity | **1.21 (1.13-1.30)** | **1.75 (1.66-1.83)** | 1.03 (0.98-1.09) | **1.39 (1.31-1.48)** | **5.43 (4.92-5.99)** |
| PGSBMI | 0.97 (0.94-1.00) | **1.12 (1.09-1.14)** | 1.00 (0.98-1.03) | **1.04 (1.01-1.07)** | **1.24 (1.20-1.29)** |
| **Mutually adjusted models** |  |  |  |  |  |
| Underweight | **2.50 (1.90-3.28)** | 0.94 (0.73-1.20) | 0.83 (0.60-1.16) | **1.35 (1.01-1.81)** | 0.44 (0.16-1.18) |
| Normal weight | Ref | Ref | Ref | Ref | Ref |
| Overweight | 1.00 (0.92-1.07) | **1.20 (1.15-1.26)** | 0.96 (0.90-1.01) | 1.06 (1.00-1.13) | **2.36 (2.13-2.63)** |
| Obesity | **1.28 (1.18-1.38)** | **1.70 (1.61-1.79)** | 1.02 (0.96-1.09) | **1.41 (1.32-1.50)** | **5.86 (5.27-6.52)** |
| PGSBMI | **0.94 (0.91-0.98)** | 1.02 (1.00-1.05) | 1.01 (0.98-1.04) | 0.99 (0.96-1.02) | **0.94 (0.90-0.97)** |
| **Interaction model** |  |  |  |  |  |
| Underweight | **2.40 (1.77-3.24)** | 1.02 (0.79-1.33) | 0.71 (0.47-1.07) | **1.44 (1.06-1.95)** | 0.36 (0.11-1.19) |
| Normal weight | Ref | Ref | Ref | Ref | Ref |
| Overweight | 1.00 (0.92-1.08) | **1.19 (1.14-1.25)** | 0.95 (0.89-1.00) | 1.05 (0.98-1.11) | **2.17 (1.95-2.42)** |
| Obesity | **1.26 (1.16-1.38)** | **1.72 (1.62-1.82)** | 1.02 (0.95-1.09) | **1.43 (1.33-1.53)** | **6.21 (5.59-6.91)** |
| PGSBMI | **0.93 (0.88-0.99)** | **1.04 (1.00-1.08)** | 1.04 (1.00-1.09) | 1.02 (0.97-1.07) | 1.04 (0.95-1.14) |
| Underweight * PGSBMI | 0.89 (0.65-1.23) | 1.25 (0.94-1.67) | 0.73 (0.50-1.08) | 1.18 (0.85-1.64) | 0.63 (0.22-1.82) |
| Overweight * PGSBMI | 1.01 (0.94-1.08) | 0.99 (0.95-1.03) | 0.95 (0.90-1.01) | 0.98 (0.93-1.03) | 0.99 (0.90-1.08) |
| Obesity * PGSBMI | 1.02 (0.95-1.10) | **0.95 (0.90-1.00)** | 0.95 (0.89-1.01) | **0.94 (0.88-1.00)** | **0.81 (0.73-0.88)** |
| **WHR** | **Mortality** | **CVD** | **Cancer** | **CRD** | **Diabetes** |
| **Separate models** |  |  |  |  |  |
| Normal WHR | Ref | Ref | Ref | Ref | Ref |
| High WHR | **1.26 (1.19-1.34)** | **1.40 (1.34-1.45)** | **1.08 (1.03-1.13)** | **1.29 (1.23-1.35)** | **2.86 (2.66-3.08)** |
| PGSWHR | **1.10 (1.08-1.13)** | **1.12 (1.10-1.14)** | **1.03 (1.01-1.05)** | **1.10 (1.08-1.13)** | **1.42 (1.38-1.47)** |
| **Mutually adjusted models** |  |  |  |  |  |
| Normal WHR | Ref | Ref | Ref | Ref | Ref |
| High WHR | **1.17 (1.10-1.26)** | **1.32 (1.27-1.38)** | 1.05 (1.00-1.11) | **1.21 (1.14-1.28)** | **2.32 (2.14-2.52)** |
| PGSWHR | **1.07 (1.04-1.10)** | **1.05 (1.03-1.07)** | 1.02 (1.00-1.05) | **1.06 (1.03-1.09)** | **1.23 (1.19-1.27)** |
| **Interaction model** |  |  |  |  |  |
| Normal WHR | Ref | Ref | Ref | Ref | Ref |
| High WHR | **1.18 (1.10-1.26)** | **1.32 (1.27-1.38)** | **1.05 (1.00-1.11)** | **1.21 (1.14-1.28)** | **2.31 (2.13-2.51)** |
| PGSWHR | 1.03 (0.98-1.08) | **1.04 (1.01-1.07)** | 1.01 (0.98-1.05) | **1.05 (1.02-1.09)** | **1.18 (1.11-1.25)** |
| High * PGSWHR | **1.06 (1.00-1.13)** | 1.02 (0.98-1.06) | 1.02 (0.97-1.06) | 1.01 (0.96-1.06) | 1.06 (0.99-1.13) |

Hazard rate ratios (HR) and 95% confidence intervals (CI) from Cox proportional hazard models are presented within the non-European genetic ancestry study population, showing risk of mortality or NCD (non-communicable disease) in relation to body mass index (BMI) and waist-to-hip ratio (WHR) and a polygenic score for BMI and WHR. Exposures included BMI categories (underweight, normal weight (reference category), overweight, obesity), WHR categories (normal (reference category), and high), and polygenic scores for BMI (PGSBMI) and WHR (PGSWHR). Risks were estimated separately for each outcome: mortality, cardiovascular disease (CVD), cancer, chronic respiratory disease (CRD), and diabetes. Three types of models were applied. 1. Separate models including either the adiposity measure or the corresponding PGS; 2. mutually adjusted models including both the adiposity measure and its corresponding PGS; and 3. interaction models additionally including an interaction term between the adiposity measure and its corresponding PGS. All models were adjusted for age, sex, ethnicity, education, assessment center, and Townsend deprivation index. Models including a PGS were also adjusted for the first ten genetic principal components. Bold numbers indicate statistical significance at the α=0.05 level. Abbreviations: BMI, body mass index; CI, confidence interval; CRD, chronic respiratory disease; CVD, cardiovascular disease; HR, hazard rate ratio; NCD, non-communicable disease; PGSBMI, polygenic score for BMI; PGSWHR, polygenic score for WHR; WHR, waist-to-hip ratio
